# Supplementary material for: Green Leaf Volatile-Burst in Selaginella moellendorffii
Source: Front Plant Sci. 2021 Oct 27;12:731694. doi: 10.3389/fpls.2021.731694 (PMC8578206; doi:10.3389/fpls.2021.731694)
Supplement: Supplementary file 1 [file Data_Sheet_1.xlsx]

## Sheet: Dataset 1
Supplementary dataset 1. The amounts (nmol gFW-1) of oxylipin volatiles formed after disruption of leaves or thalli.
		n-Hexanal			(Z)-3-Hexenal			(E)-2-Hexenal			3-Hexen-1-ol			1-Hexanol			5-Ethyl-2(5H)-furanone	5-Ethyl-2(5H)-furanone	5-Ethyl-2(5H)-furanone	1-Octen-3-ol			2-Octen-1-ol			3-Octanol			2,3-Octanedione			2-Nonenal			2,6-Nonadienal			1-Penten-3-ol			(Z)-2-Penten-1-ol
	Time after disruption (min)	0	1	5	0	1	5	0	1	5	0	1	5	0	1	5	0	1	5	0	1	5	0	1	5	0	1	5	0	1	5	0	1	5	0	1	5	0	1	5	0	1	5
Monilophytes	Adiantum capillus-veneris	0	1.45	1.11	18.76	486.25	149.86	1.07	64.81	27.87	4.76	15.81	3.84	0	0	0	0	0	0	14.48	28.62	20.99	0	0	0	0.59	1.48	0.12	0	0	0	1.7	22.94	17.57	0	0	0	0	0	0	0	2.63	1.86
	Equisetum hyemale	0.26	0	6.37	0	0.55	5.09	0	0	0	0	0	0	0	0	0	0	0	0	0	0	0	0	0	0	0	0	0	0	0	0	0	0	0	0	0	0	0	0	0	0	0	0
	Equisetum arvense	1.02	22.21	13.46	5.97	120.28	42.77	0	10.57	2.74	0	0	0	0	0	0	0	0	0	0	0	0	0	0	0	0	0	0	0	0	0	0	0	0	0	0	0	0	0	0	0	0	0
Lycophytes	Selaginella moellemdorffii	3.75	17.08	21.57	111.94	502.11	201.91	2.75	29	15.27	0	3.08	3.09	0	0	0	0	0	0	13.96	15.07	15.82	0	0	0	0	0	0	0	0	0	0	0	0	0	0	0	0	0	0	0	0	0
	Selaginella tamariscina	1.73098	20.7002	45.8119	0	193.651	101.449	0	13.3058	8.5993	0	1.51528	2.05649	0	0	0	0	0	0	0	0	0	0	0	0	0	0	0	0	0	0	0	0	0	0	0	0	0	0	0	0	0	0
	Selaginella involvens	22.15	21.82	30.5	157.7	700	571.33	11.41	63.02	61.8	0	8.34	9.13	0	0	0	0.990659	6.70324	8.06115	145.03	99.2	124.08	0	0	0	46.3	33.48	46.78	0	0	0	0	0	0	0	0	0	1.79	4.09	4.66	1.11	4.64	5
	Selaginella uncinata	5.69521	10.6667	13.6611	234.109	727.61	464.702	12.812	68.9968	52.7888	1.75295	4.15008	3.14147	0	0	0	0.681689	9.28997	10.1486	27.3165	62.7829	51.4014	0	0	0	14.1261	30.7835	26.5447	0	0	0	0	0	0	0	0	0	1.00271	4.03223	3.12973	0.739351	5.55375	5.56109
	Lycopodium clavatum	3.18422	0.209519	1.25097	0.578316	10.798	14.3682	0	0	0	0	0.424389	0.702203	0	0	0	0	0	0	0	0	0	0	0	0	0	0	0	7.80506	0.261102	0	0	0	0	0	0	0	0	0	0	0	0	0
	Lycopodium dendroideum	16.891	14.7746	33.0579	23.1089	224.457	316.951	0.374744	12.3894	24.7015	1.538	1.96208	3.02767	0	0	0	0	0	0	0	0	0	0	0	0	0	0	0	71.104	1.95995	3.28078	0	0	0	0	0	0	0	0	0	0	0	0
	Lycopodium serratum var. serratum	0	0	0	0	9.9	22.8	0	0	0	0	0	0	0	0	0	0	0	0	0	0	0	0	0	0	0	0	0	0	0	0	0	0	0	0	0	0	0	0	0	0	0	0
Bryophytes	Calohypnum plumiforme	0	0	0	0	0	0	0	0	0	0	0	0	0	0	0	0	0	0	11.4191	121.198	168.457	0	2.50181	4.06242	0	0	0	0	0	0	0	0	0	0	0	0	0	0	0	0	0	0
	Dicranum scoparium	0	0	0	67.013	1879	1454.12	5.87671	130.882	97.6938	1.70782	26.2887	31.8386	0	0	0	0.990954	49.9495	62.9018	1.97816	22.3413	11.9994	0	0	0	0	0	0	0	0	0	0	0	0	0	0	0	2.32101	59.053	58.0102	1.87515	52.0647	60.3766
	Physcomitrella patens	1.16	0	0	0	0	0	0	0	0	0	0	0	0	0	0	0	0	0	70.94	481.09	355.39	3.42	22.52	15.62	0	0	0	0	0	0	7.55	43.28	28.9	0	0	0	0	0	0	0	0	0
	Polytrichum juniperinum	0	0	0	0	0	0	0	0	0	0	0	0	0	0	0	0	0	0	11.0386	152.927	133.988	0	7.64007	6.12768	0	0	0	0	0	0	0	0	0	0	0	0	0	0	0	0	0	0
	Sphagnum palustre	46.86	84.68	47.97	28.78	19.81	7.99	0	0	0	0	0	0	0	2.95	2.59	0	0	0	0	3.54	1.93	0	0	0	0	0	0	0	0	0	0	0	0	4.51	6.39	2.4	0	1.63	1.11	0	0	0
	Marchantia polymorpha	0	0	0	0	0	0	0	0	0	0	0	0	0	0	0	0	0	0	0	0	0	0	0	0	0	0	0	0	0	0	0	0	0	0	0	0	0	0	0	0	0	0
